# Supplementary material for: Medium-Chain Fatty Acids, Beta-Hydroxybutyric Acid and Genetic Modulation of the Carnitine Shuttle Are Protective in a Drosophila Model of ALS Based on TDP-43
Source: Front Mol Neurosci. 2018 May 31;11:182. doi: 10.3389/fnmol.2018.00182 (PMC5990617; doi:10.3389/fnmol.2018.00182)
Supplement: Supplementary file 1 [file Table_1.XLSX]

## Sheet: Sheet1
								TDP WT	TDP G298S	TDP G298S	TDP WT	TDP G298S		Super Pathway	Sub Pathway	Chemical ID	CAS	RI	Mass
											w1118	w1118
Super Pathway	Sub Pathway	Biochemical Name	Platform	Comp ID	KEGG	HMDB	PUBCHEM	w1118	w1118	TDP WT	p-value	p-value	X
Lipid	Medium Chain Fatty Acid	caprylate (8:0)	LC/MS neg	32492	C06423	HMDB00482	379	0.91	0.84	0.92	0.322	0.0947		Lipid	Medium Chain Fatty Acid	932	124-07-2	4362	143.108
		caprate (10:0)	LC/MS neg	1642	C01571	HMDB00511	2969	1.13	1.03	0.91	0.1394	0.6364		Lipid	Medium Chain Fatty Acid	888	112-37-8	5090.7	171.139
		10-undecenoate (11:1n1)	LC/MS neg	32497				1	0.94	0.94	0.881	0.6643		Lipid	Medium Chain Fatty Acid	100001197	1333-28-4	5085.8	183.139
		laurate (12:0)	LC/MS neg	1645	C02679	HMDB00638	3893	1.12	1.06	0.95	0.2719	0.4854		Lipid	Medium Chain Fatty Acid	181	143-07-7	5300	199.17
		5-dodecenoate (12:1n7)	LC/MS neg	33968		HMDB00529	5312378	0.88	0.82	0.93	0.2037	0.0508		Lipid	Medium Chain Fatty Acid	100001232	2430-94-6	5224	197.155
	Long Chain Fatty Acid	myristate (14:0)	LC/MS neg	1365	C06424	HMDB00806	11005	1.03	0.97	0.94	0.7417	0.9668		Lipid	Long Chain Fatty Acid	519	544-63-8	5440	227.202
		myristoleate (14:1n5)	LC/MS neg	32418	C08322	HMDB02000	5281119	1.02	1.01	0.99	0.7413	0.7832		Lipid	Long Chain Fatty Acid	100001198	544-64-9	5346.9	225.186
		pentadecanoate (15:0)	LC/MS neg	1361	C16537	HMDB00826	13849	0.92	0.77	0.84	0.7983	0.1489		Lipid	Long Chain Fatty Acid	980	1002-84-2;10002-84-2	5521	241.217
		palmitate (16:0)	LC/MS neg	1336	C00249	HMDB00220	985	0.91	0.79	0.88	0.4195	0.0435		Lipid	Long Chain Fatty Acid	424	57-10-3	5618	255.233
		palmitoleate (16:1n7)	LC/MS neg	33447	C08362	HMDB03229	445638	0.97	0.82	0.84	0.998	0.2499		Lipid	Long Chain Fatty Acid	452	373-49-9	5475	253.217
		margarate (17:0)	LC/MS neg	1121		HMDB02259	10465	0.76	0.65	0.85	0.2025	0.0378		Lipid	Long Chain Fatty Acid	891	506-12-7	5731	269.249
		10-heptadecenoate (17:1n7)	LC/MS neg	33971			5312435	0.85	0.68	0.79	0.7824	0.23		Lipid	Long Chain Fatty Acid	100001278	29743-97-3	5555	267.233
		oleate (18:1n9)	LC/MS neg	1359	C00712	HMDB00207	445639	0.92	0.77	0.84	0.7135	0.1768		Lipid	Long Chain Fatty Acid	442	112-80-1	5655	281.249
		nonadecanoate (19:0)	LC/MS neg	1356	C16535	HMDB00772	12591	0.89	0.9	1.01	0.6763	0.7703		Lipid	Long Chain Fatty Acid	892	646-30-0	6068	297.28
		10-nonadecenoate (19:1n9)	LC/MS neg	33972		HMDB13622	5312513	0.7	0.73	1.05	0.2182	0.388		Lipid	Long Chain Fatty Acid	100001277	73033-09-7	5780	295.264
		7-nonadecenoate (19:1n12)	LC/MS neg	34422				0.82	0.62	0.76	0.4783	0.0979		Lipid	Long Chain Fatty Acid	100001290		5807	295.264
		arachidate (20:0)	LC/MS neg	1118	C06425	HMDB02212	10467	0.85	0.74	0.87	0.4454	0.1622		Lipid	Long Chain Fatty Acid	893	506-30-9	6295	311.296
		eicosenoate (20:1n9 or 11)	LC/MS neg	33587			5282768	0.85	0.7	0.83	0.6873	0.2915		Lipid	Long Chain Fatty Acid	100001335		5950	309.28
		erucate (22:1n9)	LC/MS neg	1552	C08316	HMDB02068	5281116	0.77	0.71	0.93	0.3719	0.219		Lipid	Long Chain Fatty Acid	1087	112-86-7	6355.6	337.311
	Polyunsaturated Fatty Acid (n3 and n6)	linoleate (18:2n6)	LC/MS neg	1105	C01595	HMDB00673	5280450	0.83	0.63	0.75	0.524	0.0743		Lipid	Polyunsaturated Fatty Acid (n3 and n6)	180	60-33-3	5535	279.233
		linolenate [alpha or gamma; (18:3n3 or 6)]	LC/MS neg	34035	C06427		5280934	0.72	0.57	0.79	0.204	0.0232		Lipid	Polyunsaturated Fatty Acid (n3 and n6)	100001337		5450	277.217
	Fatty Acid, Branched	13-methylmyristic acid	LC/MS neg	38293			151014	1.36	1.51	1.11	0.4085	0.2241		Lipid	Fatty Acid, Branched	100002344	2485-71-4	5499	241.217
		15-methylpalmitate (isobar with 2-methylpalmitate)	LC/MS neg	38768			17903417	1.45	1.25	0.86	0.0358	0.2079		Lipid	Fatty Acid, Branched	100002945		5695	269.249
		17-methylstearate	LC/MS neg	38296			3083779	1.41	1.11	0.79	0.1627	0.6632		Lipid	Fatty Acid, Branched	100002356	2724-59-6	5993	297.28
	Fatty Acid, Dicarboxylate	2-hydroxyglutarate	LC/MS polar	37253	C02630	HMDB00606	43	0.92	0.96	1.04	0.0551	0.3101		Lipid	Fatty Acid, Dicarboxylate	100002070	40951-21-1	3352.8	147.03
		4-hydroxy-2-oxoglutaric acid	GC/MS	40062	C01127	HMDB02070	599	1	1.17	1.18	0.7107	0.3506		Lipid	Fatty Acid, Dicarboxylate	100002537	1187-99-1	1658	333.1
		adipate	LC/MS pos	21134	C06104	HMDB00448	196	1.08	0.88	0.82	0.5567	0.3819		Lipid	Fatty Acid, Dicarboxylate	100000863	124-04-9	2460.4	147.065
		sebacate (decanedioate)	LC/MS neg	32398	C08277	HMDB00792	5192	0.65	0.45	0.69	0.0036	1.281e-06		Lipid	Fatty Acid, Dicarboxylate	100001211	111-20-6	1788	201.113
		1,11-undecanedicarboxylate	LC/MS neg	43027		HMDB02327	10458	0.86	0.73	0.85	0.6352	0.1629		Lipid	Fatty Acid, Dicarboxylate	100004262	505-52-2	3530	243.16
		dodecanedioate	LC/MS neg	32388	C02678	HMDB00623	12736	0.77	0.54	0.7	0.3615	0.0258		Lipid	Fatty Acid, Dicarboxylate	100001102	693-23-2	2990	229.145
		tetradecanedioate	LC/MS neg	35669		HMDB00872	13185	0.88	0.69	0.79	0.8723	0.302		Lipid	Fatty Acid, Dicarboxylate	100001613	821-38-5	4000	257.176
		hexadecanedioate	LC/MS neg	35678	C19615	HMDB00672	10459	0.8	0.63	0.78	0.4458	0.0509		Lipid	Fatty Acid, Dicarboxylate	100001614	505-54-4	4615	285.207
	Fatty Acid, Amino	2-aminoheptanoate	LC/MS pos	43761			227939	1.09	1.03	0.95	0.5053	0.8438		Lipid	Fatty Acid, Amino	100004542	1115-90-8	2530	146.118
		2-aminooctanoate	LC/MS pos	43343		HMDB00991	69522	1.87	1.76	0.94	0.0031	0.0062		Lipid	Fatty Acid, Amino	100004227	644-90-6	3355	160.133
	Fatty Acid Synthesis	malonate (propanedioate)	LC/MS polar	15872	C00383	HMDB00691	867	0.89	1.04	1.17	0.1711	0.624		Lipid	Fatty Acid Synthesis	818	141-82-2;26522-22-85-0	3447	103.004
	Fatty Acid Metabolism (also BCAA Metabolism)	propionylcarnitine	LC/MS pos	32452	C03017	HMDB00824	107738	0.92	1.05	1.14	0.8583	0.6692		Lipid	Fatty Acid Metabolism (also BCAA Metabolism)	100001162	17298-37-2	1590	218.139
		propionylglycine	LC/MS pos	31932		HMDB00783	98681	2	1.64	0.82	0.0033	0.0099		Lipid	Fatty Acid Metabolism (also BCAA Metabolism)	100001150	21709-90-0	1551	132.066
		methylmalonate (MMA)	LC/MS polar	1496	C02170	HMDB00202	487	0.75	0.83	1.11	0.0678	0.2157		Lipid	Fatty Acid Metabolism (also BCAA Metabolism)	418	516-05-2	3078.4	117.019
	Fatty Acid Metabolism(Acyl Glycine)	N-octanoylglycine	LC/MS neg	43502		HMDB00832	84290	2.62	1.13	0.43	0.0132	0.5808		Lipid	Fatty Acid Metabolism(Acyl Glycine)	100003940	14246-53-8	4335.4	200.129
		N-palmitoyl glycine	LC/MS neg	42092			151008	0.6	0.67	1.13	0.223	0.4364		Lipid	Fatty Acid Metabolism(Acyl Glycine)	100003686	2441-41-0	5580	312.254
	Fatty Acid Metabolism(Acyl Carnitine)	acetylcarnitine	LC/MS pos	32198	C02571	HMDB00201	1	0.83	0.74	0.89	0.01	0.0001		Lipid	Fatty Acid Metabolism(Acyl Carnitine)	100000802	5080-50-2	1166.9	204.123
		myristoylcarnitine	LC/MS pos	33952		HMDB05066	53477791	1.41	1.99	1.42	0.0314	0.0001		Lipid	Fatty Acid Metabolism(Acyl Carnitine)	100001270	18822-89-4	5142.1	372.311
		palmitoylcarnitine	LC/MS pos	44681	C02990	HMDB00222	461	1.14	1.41	1.24	0.3647	0.0352		Lipid	Fatty Acid Metabolism(Acyl Carnitine)	100000776	6865-14-1	5204	400.342
		stearoylcarnitine	LC/MS pos	34409		HMDB00848	6426855	0.82	0.93	1.13	0.2075	0.6305		Lipid	Fatty Acid Metabolism(Acyl Carnitine)	100001391	18822-91-8	5256	428.373
		linoleoylcarnitine*	LC/MS pos	46223		HMDB06469	6450015	0.95	1.42	1.49	0.9568	0.0723		Lipid	Fatty Acid Metabolism(Acyl Carnitine)	100003151	36816-10-1	5190	424.342
		oleoylcarnitine	LC/MS pos	35160		HMDB05065	6441392;53477789	1.29	1.55	1.21	0.1606	0.0176		Lipid	Fatty Acid Metabolism(Acyl Carnitine)	100001501	38677-66-6	5215	426.358
	Carnitine Metabolism	carnitine	LC/MS pos	15500	C00318	HMDB00062	10917	0.88	0.86	0.97	0.0035	0.0006		Lipid	Carnitine Metabolism	100000007	461-05-2	688.9	162.112
	Ketone Bodies	3-hydroxybutyrate (BHBA)	LC/MS polar	542	C01089	HMDB00357	441	0.63	0.56	0.88	0.0137	0.0012		Lipid	Ketone Bodies	254	625-72-9	1443.3	103.04
	Fatty Acid, Monohydroxy	4-hydroxybutyrate (GHB)	LC/MS polar	34585	C00989	HMDB00710	10413	0.54	1.19	2.21	0.0804	0.7578		Lipid	Fatty Acid, Monohydroxy	100001507	502-85-2	1765	103.04
		3-hydroxypropanoate	GC/MS	42103	C01013	HMDB00700	68152	0.94	0.84	0.89	0.6507	0.1969		Lipid	Fatty Acid, Monohydroxy	115	503-66-2	1187.1	177.1
		3-hydroxyoctanoate	LC/MS neg	22001		HMDB01954	26613	0.84	0.83	0.99	0.1391	0.1265		Lipid	Fatty Acid, Monohydroxy	100000773	88930-08-9	3446	159.103
		3-hydroxydecanoate	LC/MS neg	22053		HMDB02203	26612	0.77	0.85	1.1	0.0886	0.2939		Lipid	Fatty Acid, Monohydroxy	100000997	5561-87-5	4634.7	187.134
		3-hydroxylaurate	LC/MS neg	32457		HMDB00387	94216	1.02	0.89	0.87	0.7944	0.2543		Lipid	Fatty Acid, Monohydroxy	100001112	53941-38-1	5175	215.165
		16-hydroxypalmitate	LC/MS neg	39609	C18218	HMDB06294	10466	0.75	0.8	1.07	0.0062	0.0395		Lipid	Fatty Acid, Monohydroxy	100002953	506-13-8	5236.2	271.228
		13-HODE + 9-HODE	LC/MS neg	37752			43013	1.05	0.91	0.86	0.5595	0.5808		Lipid	Fatty Acid, Monohydroxy	100002196		5275	295.228
	Fatty Acid, Dihydroxy	9,10-DiHOME	LC/MS neg	38399	C14828	HMDB04704	9966640	0.77	0.54	0.7	0.2302	0.0018		Lipid	Fatty Acid, Dihydroxy	179	263399-34-4	5180	313.238
	Endocannabinoid	oleic ethanolamide	LC/MS neg	38102		HMDB02088	5283454	0.81	0.51	0.63	0.7137	0.3887		Lipid	Endocannabinoid	1137	11-58-0;111-58-0	6900	324.291
		myristoyl ethanolamide	LC/MS neg	43533			8890	0.73	0.61	0.84	0.4902	0.3698		Lipid	Endocannabinoid	100004489	142-58-5	5972	270.244
		N-oleoyltaurine	LC/MS neg	39732			6437033	0.59	0.71	1.2	0.6987	0.9771		Lipid	Endocannabinoid	100003119	52514-04-2	5610	388.253
	Inositol Metabolism	myo-inositol	LC/MS polar	1124	C00137	HMDB00211	892	0.78	0.8	1.02	0.0008	0.0024		Lipid	Inositol Metabolism	363	87-89-8	3506.3	225.062
		inositol 1-phosphate (I1P)	GC/MS	1481	C04006	HMDB00213	440194	0.94	1.04	1.1	0.3215	0.5893		Lipid	Inositol Metabolism	370	573-35-3;106032-59-1	2057.8	318.1
	Phospholipid Metabolism	choline	LC/MS pos	15506	C00114	HMDB00097	305	1.02	0.9	0.88	0.6531	0.3096		Lipid	Phospholipid Metabolism	1256	67-48-1	675	104.107
		choline phosphate	LC/MS pos	34396	C00588	HMDB01565	1014	1.06	0.99	0.94	0.4222	0.9295		Lipid	Phospholipid Metabolism	267	72556-74-2	692.5	184.073
		glycerophosphorylcholine (GPC)	LC/MS pos	15990	C00670	HMDB00086	71920	0.79	0.64	0.82	0.0351	0.0004		Lipid	Phospholipid Metabolism	100000269	28319-77-9	709.9	258.11
		ethanolamine	GC/MS	1497	C00189	HMDB00149	700	0.86	0.78	0.91	0.2945	0.079		Lipid	Phospholipid Metabolism	420	141-43-5	1304	174.1
		phosphoethanolamine	LC/MS polar	1600	C00346	HMDB00224	1015	0.71	0.76	1.06	0.0027	0.0129		Lipid	Phospholipid Metabolism	1026	1071-23-4	4559.1	140.012
		cytidine-5'-diphosphoethanolamine	LC/MS pos	34410	C00570	HMDB01564	123727	0.83	0.88	1.06	0.0302	0.1275		Lipid	Phospholipid Metabolism	100001407	72842-05-8	761.8	447.068
		glycerophosphoethanolamine	LC/MS polar	37455	C01233	HMDB00114	123874	0.96	0.92	0.96	0.547	0.4089		Lipid	Phospholipid Metabolism	100001620	33049-08-0	3075	214.049
		glycerophosphoinositol*	LC/MS polar	47155				0.51	0.62	1.21	0.1368	0.4237		Lipid	Phospholipid Metabolism	100001621	16824-65-0	3850	333.059
	Lysolipid	1-myristoylglycerophosphocholine (14:0)	LC/MS pos	45453	C04230	HMDB10379	460604	0.79	0.72	0.92	0.1236	0.0499		Lipid	Lysolipid	100001383	20559-16-4	5509	468.308
		2-myristoylglycerophosphocholine*	LC/MS pos	35626				1.21	0.82	0.67	0.1982	0.1197		Lipid	Lysolipid	100001563		5470.1	468.308
		1-myristoleoylglycerophosphocholine (14:1) *	LC/MS pos	47121				1.04	0.67	0.64	0.8362	0.0056		Lipid	Lysolipid	100002858		5480	466.293
		2-myristoleoylglycerophosphocholine*	LC/MS pos	45957				1.04	0.71	0.68	0.7464	0.0021		Lipid	Lysolipid	100005725		5380	466.293
		1-pentadecanoylglycerophosphocholine (15:0)*	LC/MS pos	37418				0.61	0.4	0.66	0.1389	0.013		Lipid	Lysolipid	100002173		5568	482.324
		1-palmitoylglycerophosphocholine (16:0)	LC/MS pos	33955			86554	0.7	0.76	1.08	0.0436	0.1435		Lipid	Lysolipid	100001263	17364-16-8	5670	496.34
		2-palmitoylglycerophosphocholine*	LC/MS pos	35253			15061532	1.13	0.95	0.84	0.643	0.8018		Lipid	Lysolipid	100001562		5610	496.34
		1-palmitoleoylglycerophosphocholine (16:1)*	LC/MS pos	33230			24779461	1.02	0.83	0.81	0.9697	0.3159		Lipid	Lysolipid	100001511		5525	494.324
		2-palmitoleoylglycerophosphocholine*	LC/MS pos	35819				1.16	0.83	0.72	0.3899	0.205		Lipid	Lysolipid	100001561		5490	494.324
		1-margaroylglycerophosphocholine (17:0)	LC/MS pos	44682	C04230	HMDB12108	24779463	0.43	0.36	0.84	0.0747	0.0417		Lipid	Lysolipid	100001264	50930-23-9	5740	510.355
		1-stearoylglycerophosphocholine (18:0)	LC/MS pos	33961			497299	0.79	0.71	0.9	0.2572	0.116		Lipid	Lysolipid	100001271	19420-57-6	5847	524.371
		1-oleoylglycerophosphocholine (18:1)	LC/MS pos	48258			16081932	1.14	0.89	0.78	0.5369	0.5263		Lipid	Lysolipid	100001272	19420-56-5	5700	522.355
		2-oleoylglycerophosphocholine*	LC/MS pos	48259				1.17	0.96	0.82	0.4559	0.8921		Lipid	Lysolipid	100001556		5660	522.355
		1-linoleoylglycerophosphocholine (18:2n6)	LC/MS pos	34419	C04100		11988421	1.04	0.8	0.77	0.9996	0.2254		Lipid	Lysolipid	100001395		5575.9	520.34
		2-linoleoylglycerophosphocholine*	LC/MS pos	35257				1.01	0.75	0.75	0.9775	0.1249		Lipid	Lysolipid	100001557		5541.2	520.34
		1-linolenoylglycerophosphocholine (18:3n3)*	LC/MS pos	45951				1.29	1.09	0.85	0.5807	0.7866		Lipid	Lysolipid	100005350		5506	518.324
		2-linolenoylglycerophosphocholine(18:3n3)*	LC/MS pos	45869				0.93	0.51	0.54	0.4699	0.039		Lipid	Lysolipid	100005357		5490	518.324
		1-myristoylglycerophosphoethanolamine	LC/MS pos	35627	C04438	HMDB11500	9547070	0.67	0.71	1.06	0.0423	0.0837		Lipid	Lysolipid	100001568		5512.6	426.262
		2-myristoylglycerophosphoethanolamine*	LC/MS pos	45451				1.16	0.83	0.71	0.4438	0.2815		Lipid	Lysolipid	100001653		5476	426.262
		1-palmitoylglycerophosphoethanolamine	LC/MS neg	35631		HMDB11503	9547069	0.75	0.62	0.83	0.3369	0.135		Lipid	Lysolipid	100001567		6057.2	452.278
		2-palmitoylglycerophosphoethanolamine*	LC/MS neg	45452				0.54	0.59	1.09	0.3394	0.371		Lipid	Lysolipid	100001652		5919	452.278
		1-margaroylglycerophosphoethanolamine*	LC/MS neg	37419				0.65	0.46	0.71	0.3198	0.0326		Lipid	Lysolipid	100002171		6218	466.294
		1-stearoylglycerophosphoethanolamine	LC/MS neg	42398		HMDB11130	9547068	0.76	0.61	0.8	0.6712	0.2184		Lipid	Lysolipid	100001461	69747-55-3	6514	480.31
		2-stearoylglycerophosphoethanolamine*	LC/MS neg	41220				0.49	0.43	0.87	0.3703	0.2736		Lipid	Lysolipid	100003901		6350	480.31
		1-oleoylglycerophosphoethanolamine	LC/MS neg	35628		HMDB11506	9547071	1.08	0.75	0.69	0.5787	0.3039		Lipid	Lysolipid	100001569	89576-29-4	6125.1	478.294
		2-oleoylglycerophosphoethanolamine*	LC/MS neg	45455				1.11	0.86	0.78	0.4603	0.7692		Lipid	Lysolipid	100001651		6000	478.294
		1-palmitoleoylglycerophosphoethanolamine*	LC/MS neg	34565				0.92	0.72	0.78	0.7456	0.0862		Lipid	Lysolipid	100001784		5691	450.263
		2-palmitoleoylglycerophosphoethanolamine*	LC/MS neg	36619				1.12	0.93	0.83	0.5812	0.7788		Lipid	Lysolipid	100001785		5641	450.263
		1-linoleoylglycerophosphoethanolamine*	LC/MS neg	32635		HMDB11507	52925130	0.93	0.68	0.73	0.8227	0.0801		Lipid	Lysolipid	100001570		5900	476.278
		2-linoleoylglycerophosphoethanolamine*	LC/MS neg	36593				0.89	0.71	0.8	0.8429	0.2707		Lipid	Lysolipid	100001776		5813	476.278
		1-palmitoylglycerophosphoinositol*	LC/MS neg	35305				0.68	0.7	1.02	0.1929	0.2479		Lipid	Lysolipid	100001655		5564	571.289
		1-palmitoleoylglycerophosphoinositol*	LC/MS neg	36618				1.46	0.91	0.62	0.0587	0.6389		Lipid	Lysolipid	100001786		5445	569.273
		2-palmitoleoylglycerophosphoinositol*	LC/MS neg	39222				0.61	0.87	1.43	0.201	0.7167		Lipid	Lysolipid	100003007		5409	569.273
		1-stearoylglycerophosphoinositol	LC/MS neg	19324				0.88	0.7	0.8	0.8131	0.2314		Lipid	Lysolipid	100000656	796963-93-4	5794.3	599.32
		1-oleoylglycerophosphoinositol*	LC/MS neg	36602				1.05	0.84	0.8	0.6959	0.525		Lipid	Lysolipid	100001777		5599	597.305
		2-oleoylglycerophosphoinositol*	LC/MS neg	37232				1.06	0.95	0.9	0.8309	0.8429		Lipid	Lysolipid	100002069		5546	597.305
		1-linoleoylglycerophosphoinositol*	LC/MS neg	36594				1.33	0.79	0.59	0.1854	0.3332		Lipid	Lysolipid	100001778		5494	595.289
		1-linolenoylglycerophosphoinositol*	LC/MS neg	45864				1.32	0.66	0.5	0.2495	0.0454		Lipid	Lysolipid	100005710		5425	593.273
		1-stearoylglycerophosphoserine*	LC/MS neg	45966			9547101	1.04	0.52	0.51	0.8754	0.1763		Lipid	Lysolipid	100004327		5800	524.299
		1-oleoylglycerophosphoserine	LC/MS neg	19260			9547099	1.43	1.02	0.71	0.141	0.9946		Lipid	Lysolipid	100000630		5607	522.284
		2-oleoylglycerophosphoserine*	LC/MS neg	37948				1.63	1.02	0.62	0.5376	0.7458		Lipid	Lysolipid	100002312		5565	522.284
		1-palmitoylglycerophosphoglycerol*	LC/MS neg	45970			3300276	0.68	0.67	0.99	0.0799	0.0889		Lipid	Lysolipid	100005717		5570	483.273
		oleoyl-linoleoyl-glycerophosphoinositol (1)*	LC/MS polar	48303				0.81	0.85	1.05	0.0002	0.0036		Lipid	Lysolipid	100006140		902	859.534
		palmitoyl-linoleoyl-glycerophosphoinositol (1)*	LC/MS polar	48304				0.84	0.96	1.14	0.0052	0.4964		Lipid	Lysolipid	100006138		910	833.518
	Glycerolipid Metabolism	glycerol	LC/MS neg	15122	C00116	HMDB00131	753	0.94	0.86	0.92	0.4646	0.0756		Lipid	Glycerolipid Metabolism	1254	56-81-5	758	91.0401
		glycerol 3-phosphate (G3P)	LC/MS polar	43847	C00093	HMDB00126	754	0.91	0.85	0.93	0.4834	0.1753		Lipid	Glycerolipid Metabolism	100000258	29849-82-9	3938.7	171.006
	Monoacylglycerol	1-myristoylglycerol (1-monomyristin)	LC/MS neg	35625	C01885	HMDB11561	79050	0.59	0.53	0.89	0.0459	0.0229		Lipid	Monoacylglycerol	100001618	75685-84-6	6353.3	227.202
		2-myristoylglycerol (2-monomyristin)	LC/MS neg	34383			137938	1.07	0.93	0.87	0.4355	0.7445		Lipid	Monoacylglycerol	100001408	27214-38-6	6230	227.202
		1-pentadecanoylglycerol (1-monopentadecanoin)	LC/MS neg	47898			190750	0.94	0.88	0.93	0.769	0.6785		Lipid	Monoacylglycerol	100001431		6200	241.217
		1-palmitoylglycerol (1-monopalmitin)	LC/MS neg	21127		HMDB31074	14900	0.52	0.61	1.18	0.0139	0.0655		Lipid	Monoacylglycerol	100000827	542-44-9	6400	255.233
		2-palmitoylglycerol (2-monopalmitin)	LC/MS neg	33419		HMDB11533	123409	0.79	1.13	1.43	0.5732	0.588		Lipid	Monoacylglycerol	100001048	23470-00-0	6628.9	255.233
		1-margaroylglycerol (1-monoheptadecanoin)	LC/MS neg	34391			107036	0.93	0.96	1.04	0.6049	0.9742		Lipid	Monoacylglycerol	100001429	68002-72-2	6571	269.249
		1-oleoylglycerol (1-monoolein)	LC/MS neg	21184		HMDB11567	5283468	0.74	0.69	0.94	0.2149	0.153		Lipid	Monoacylglycerol	100000924	111-03-5	6794	281.249
		2-oleoylglycerol (2-monoolein)	LC/MS neg	21232			5319879	0.63	0.7	1.1	0.2361	0.431		Lipid	Monoacylglycerol	100000943	3443-84-3	6950	281.249
		1-linoleoylglycerol (1-monolinolein)	LC/MS neg	27447			5283469	0.72	0.58	0.8	0.2743	0.0677		Lipid	Monoacylglycerol	100001040	2277-28-3	6477	279.233
		2-linoleoylglycerol (2-monolinolein)	LC/MS neg	32506		HMDB11538	5365676	0.58	0.56	0.96	0.28	0.2405		Lipid	Monoacylglycerol	100000987	3443-82-1	6250	279.233
		1-linolenoylglycerol	LC/MS neg	34393		HMDB11569	53480978	0.73	0.54	0.74	0.3343	0.0397		Lipid	Monoacylglycerol	100001435		6214	277.217
		oleoyl-linoleoyl-glycerol	LC/MS polar	48424				1.06	1.26	1.18	0.6595	0.1998		Lipid	Monoacylglycerol	100006252		690	663.521
	Sphingolipid Metabolism	N-palmitoyl-sphingosine*	LC/MS polar	48278		HMDB04949	5283564	0.95	0.95	1	0.4785	0.6623		Lipid	Sphingolipid Metabolism	1518	24696-26-2	703	582.51
		palmitoleoyl sphingomyelin*	LC/MS polar	42459				1	1	1	0.9793	1		Lipid	Sphingolipid Metabolism	100004329		866	745.55
	Mevalonate Metabolism	3-hydroxy-3-methylglutarate	LC/MS polar	531	C03761	HMDB00355	1662	0.87	0.83	0.95	0.0431	0.0087		Lipid	Mevalonate Metabolism	112	503-49-1	2700	161.046
	Sterol	beta-sitosterol	GC/MS	27414	C01753	HMDB00852	222284	0.95	0.8	0.84	0.3626	0.0107		Lipid	Sterol	100001033	83-46-5	2380.8	357.4
		campesterol	GC/MS	39511	C01789	HMDB02869	173183	0.97	0.9	0.93	0.6724	0.2573		Lipid	Sterol	100001269	474-62-4	2353	343.4
		ergosterol	GC/MS	27553	C01694	HMDB00878	444679	0.95	0.92	0.97	0.4209	0.323		Lipid	Sterol	100001020	57-87-4	2346.1	363.3
